# Supplementary material for: Respiratory mechanics and lung stress/strain in children with acute respiratory distress syndrome
Source: PubMed Central journal article supplement (PMC4742456; doi:10.1186/s13613-016-0113-0), 2016-02-05
Supplement: 13613_2016_113_MOESM1_ESM.pdf [file 13613_2016_113_MOESM1_ESM.pdf]

# **RESPIRATORY MECHANICS AND LUNG STRESS / STRAIN IN CHILDREN WITH ACUTE RESPIRATORY DISTRESS SYNDROME**

Davide Chiumello, MD<sup>1,2</sup>; Giovanna Chidini MD<sup>3</sup>, Edoardo Calderini<sup>3</sup>, Andrea Colombo<sup>2</sup>,  
Francesco Crimella<sup>2</sup>, Matteo Brioni<sup>2</sup>

<sup>1</sup> Dipartimento di Anestesia, Rianimazione (Intensiva e Subintensiva) e Terapia del Dolore,  
Fondazione IRCCS Ca' Granda - Ospedale Maggiore Policlinico, Milano, Italy

<sup>2</sup> Dipartimento di Fisiopatologia Medico-Chirurgica e dei Trapianti, Università degli Studi di  
Milano, Italy

<sup>3</sup> Terapia Intensiva Pediatrica, Dipartimento di Anestesia e Rianimazione, Fondazione IRCCS Ca  
Granda Ospedale Maggiore Policlinico, Milano, Italy

**Figure S1.** Schematic representation of the lung volume changes observed during the different steps of the experimental protocol.

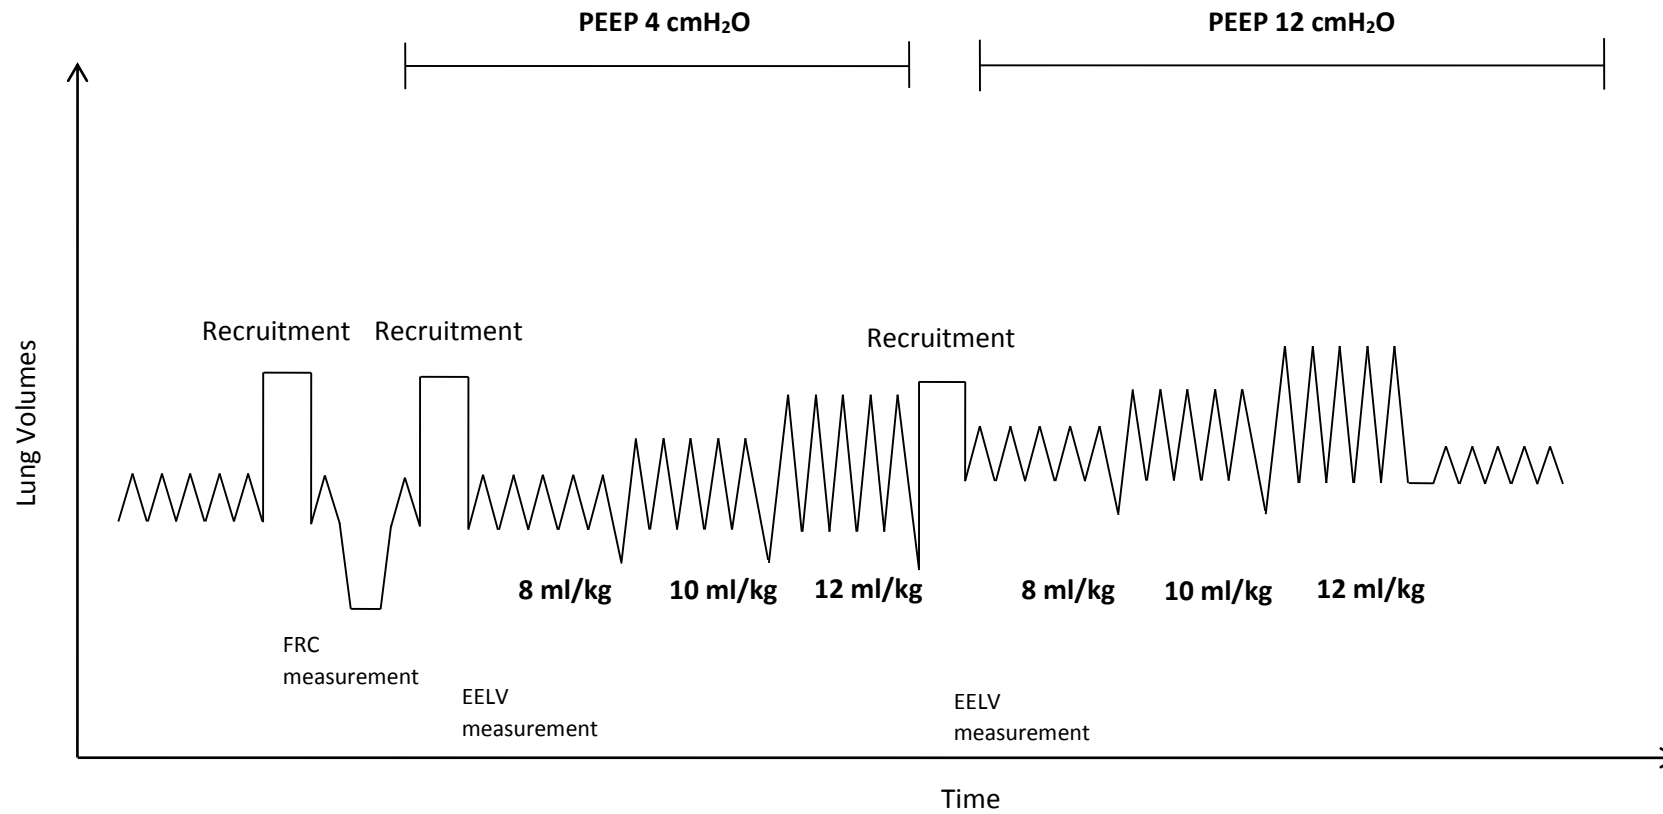

**Figure S2.** Linear regression between functional residual capacity and age in ARDS patients ( $y=98.05+1.32x$ ,  $r^2=0.71$ ,  $p=0.002$ ).

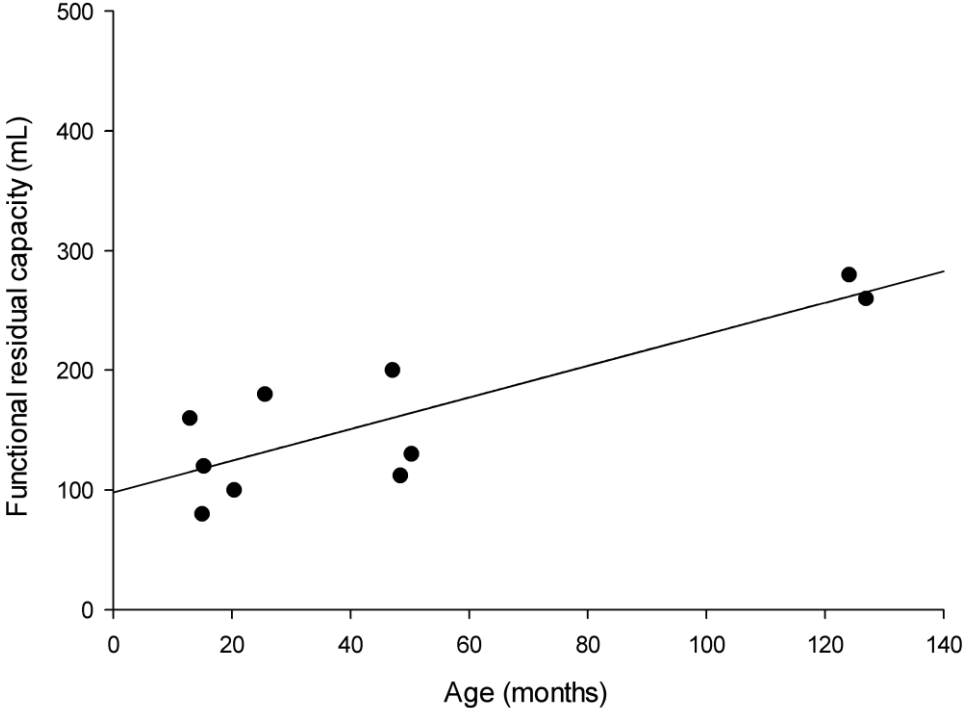

**Figure S3.** Linear regression between functional residual capacity and age in control patients ( $y=176.81+1.86x$ ,  $r^2=0.49$ ,  $p=0.02$ ).

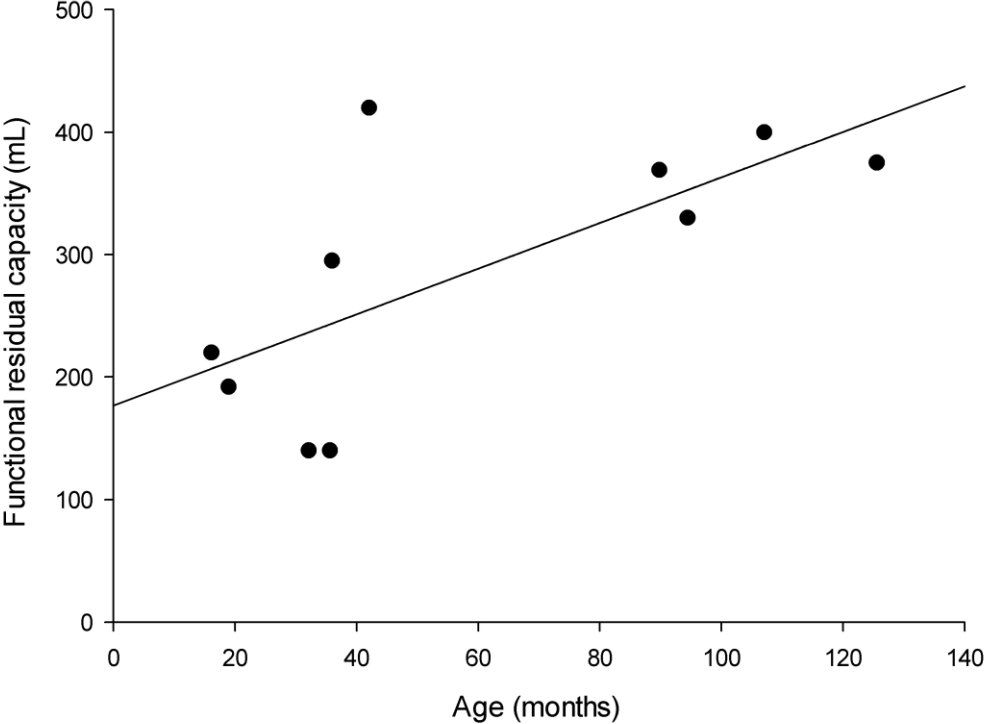

**Figure S4.** Linear regression between respiratory system compliance and end expiratory lung volume in ARDS patients ( $y=4.38+0.01x$ ,  $r^2=0.49$ ,  $p<0.001$ ).

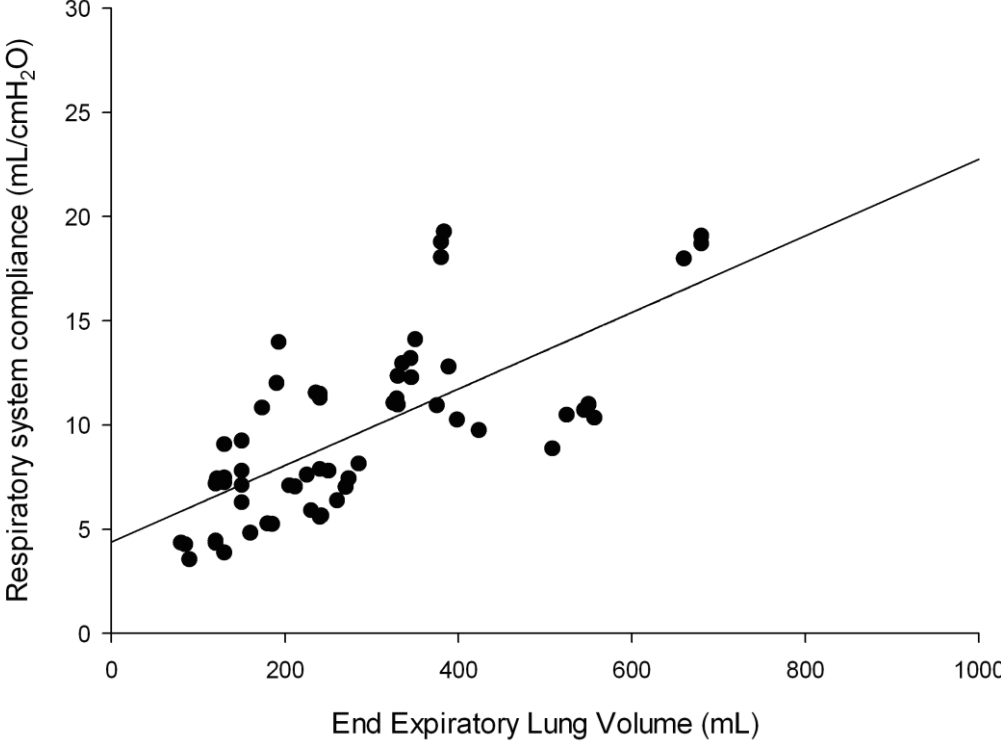

**Figure S5.** Linear regression between lung compliance and end expiratory lung volume in ARDS patients ( $y=5.04+0.02x$ ,  $r^2=0.44$ ,  $p<0.001$ ).

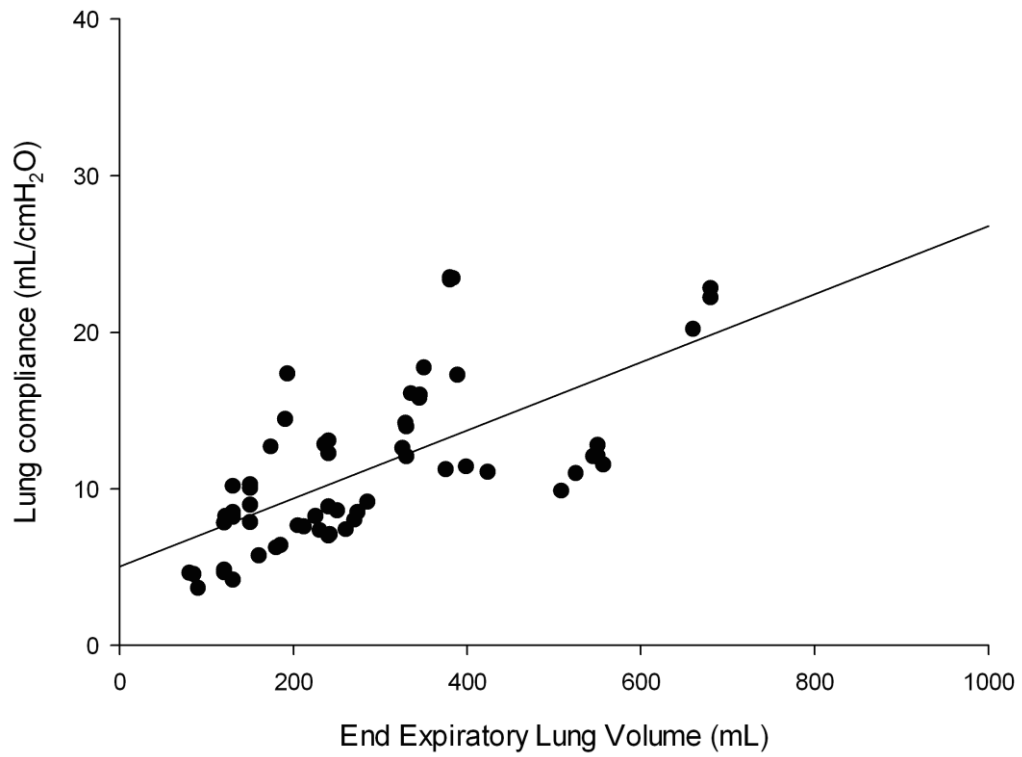

**Figure S6.** Linear regression between respiratory system compliance and end expiratory lung volume in control patients ( $y=10.63+0.01x$ ,  $r^2=0.43$ ,  $p<0.001$ ).

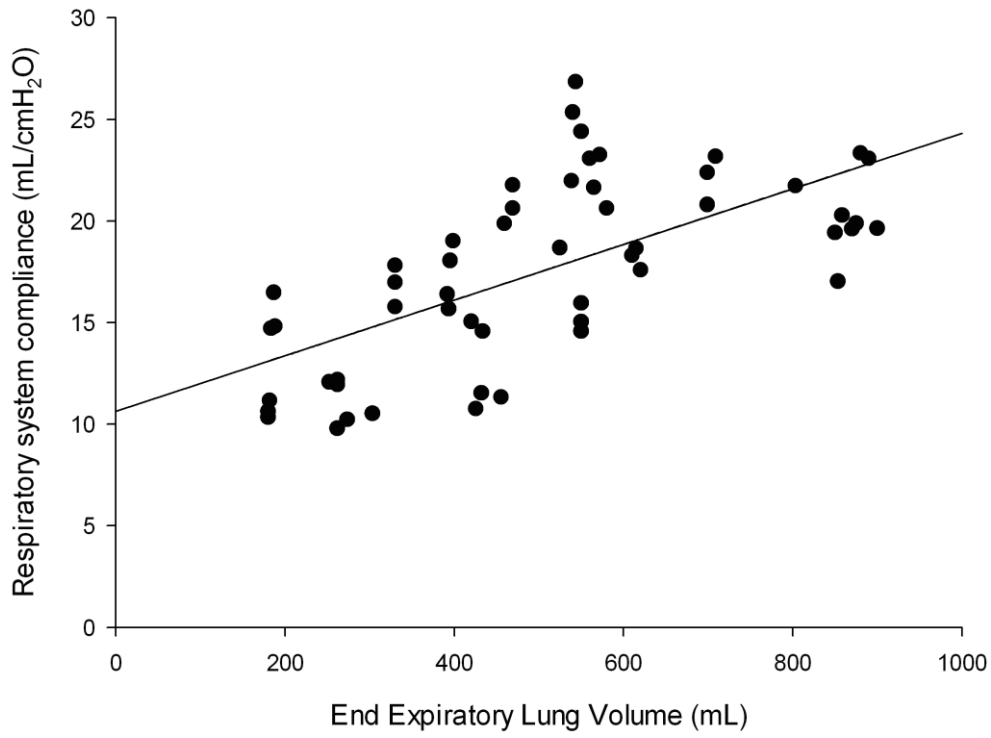

**Figure S7.** Linear regression between lung compliance and end expiratory lung volume in control patients ( $y=13.78+0.01x$ ,  $r^2=0.34$ ,  $p<0.001$ ).

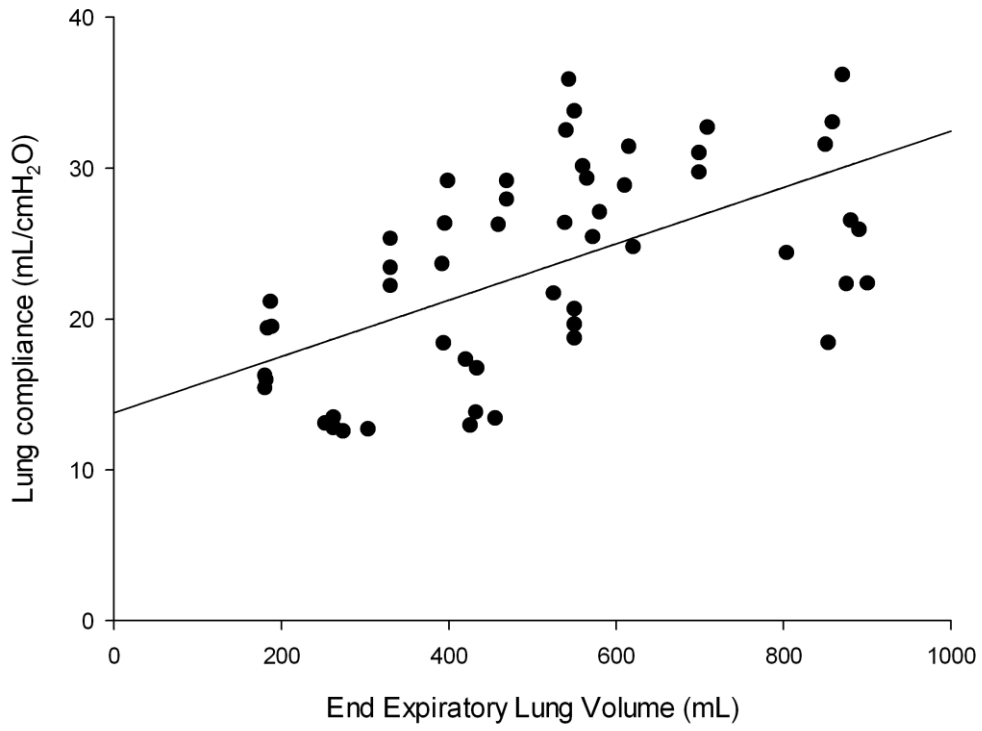



**Figure S8.** Linear regression between respiratory system compliance and age in ARDS patients ( $y=7.87+0.09x$ ,  $r^2=0.64$ ,  $p=0.005$ ).

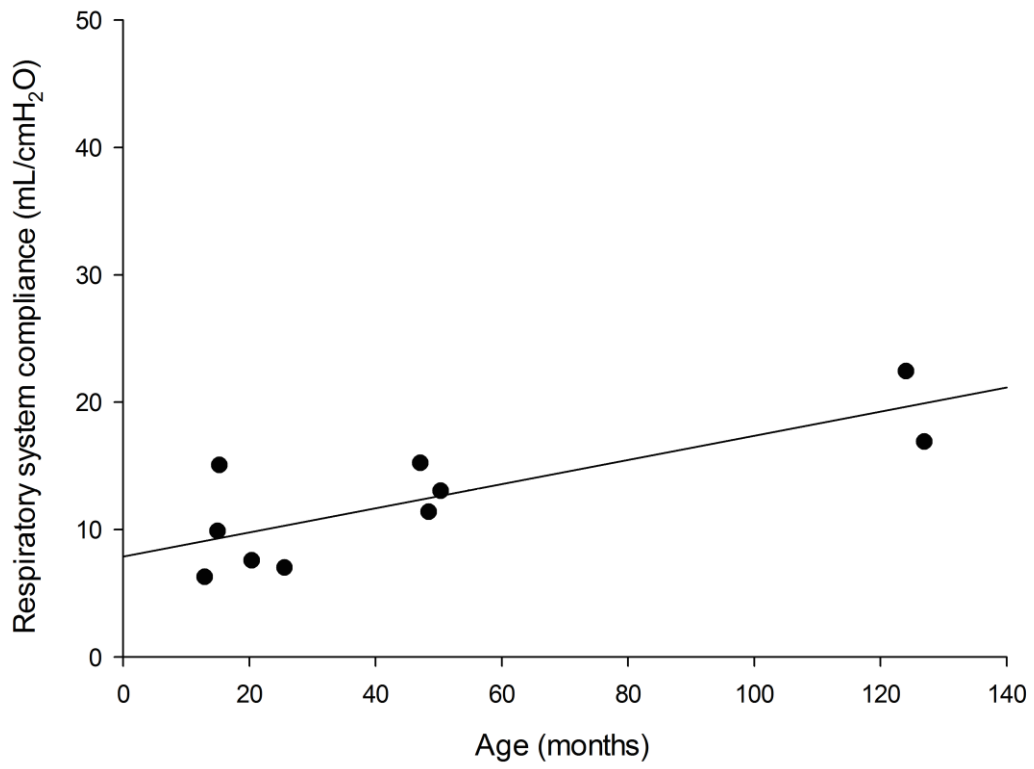

**Figure S9.** Linear regression between respiratory system compliance and age in control patients ( $y=17.79+0.15x$ ,  $r^2=0.35$ ,  $p=0.071$ ).

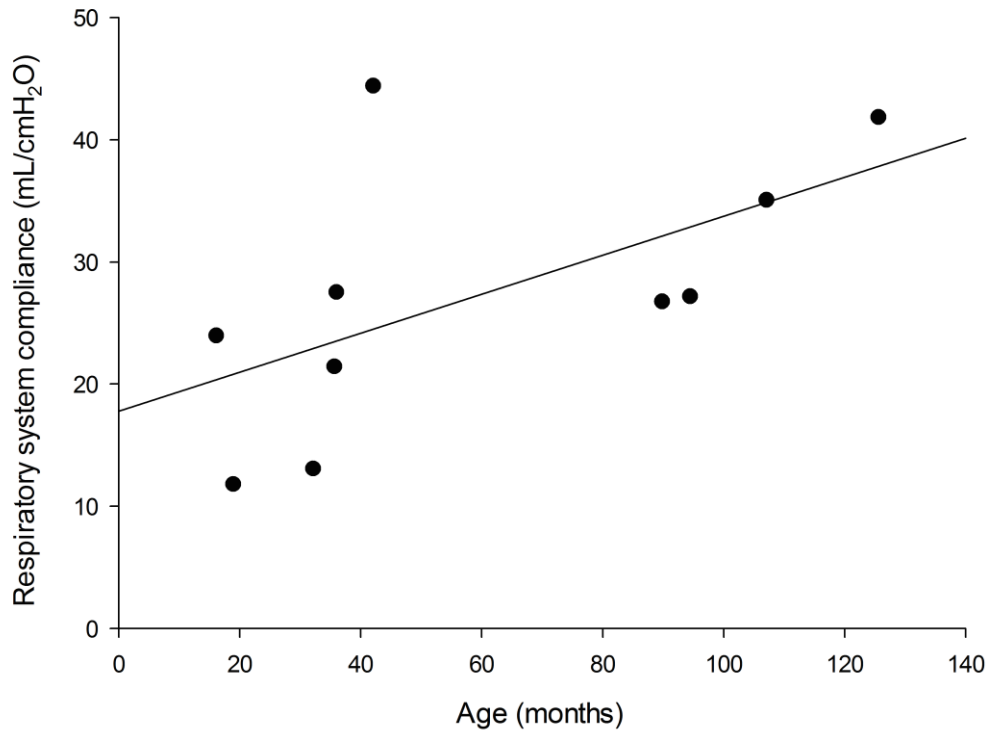

**Figure S10.** Linear regression between airway driving pressure and lung stress considering both ARDS and control group ( $y=3.135+1.058x$ ,  $r^2=0.689$ ,  $p<0.001$ ).

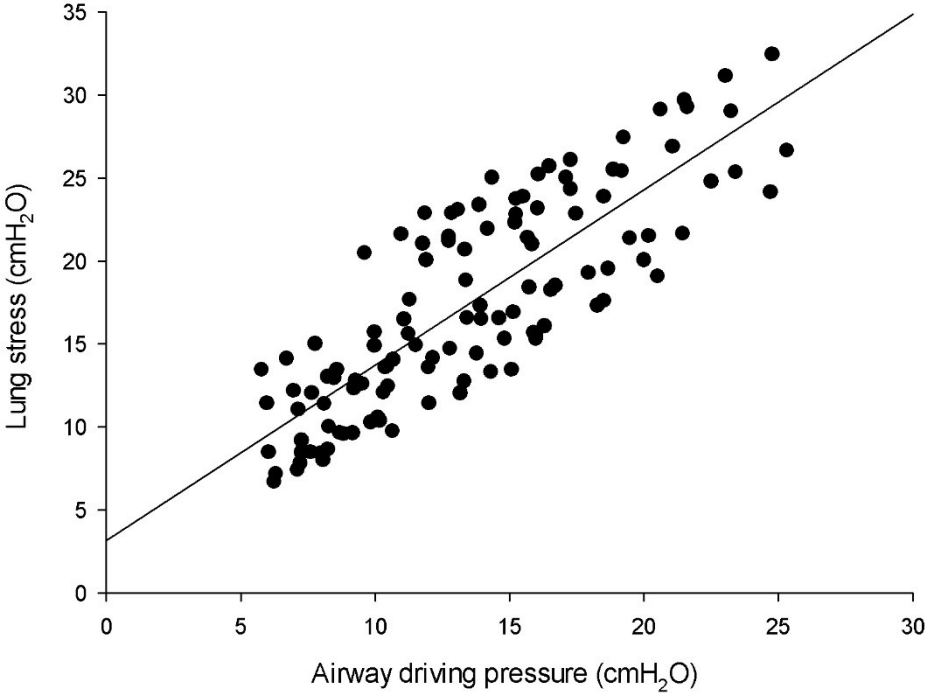

**Figure S11.** Linear regression between lung specific elastance (mean of the determinations at different PEEP ad Vt) and patient's age ( $y=11,538+0,00304x$ ,  $r^2=0.00126$   $p=0.882$ )

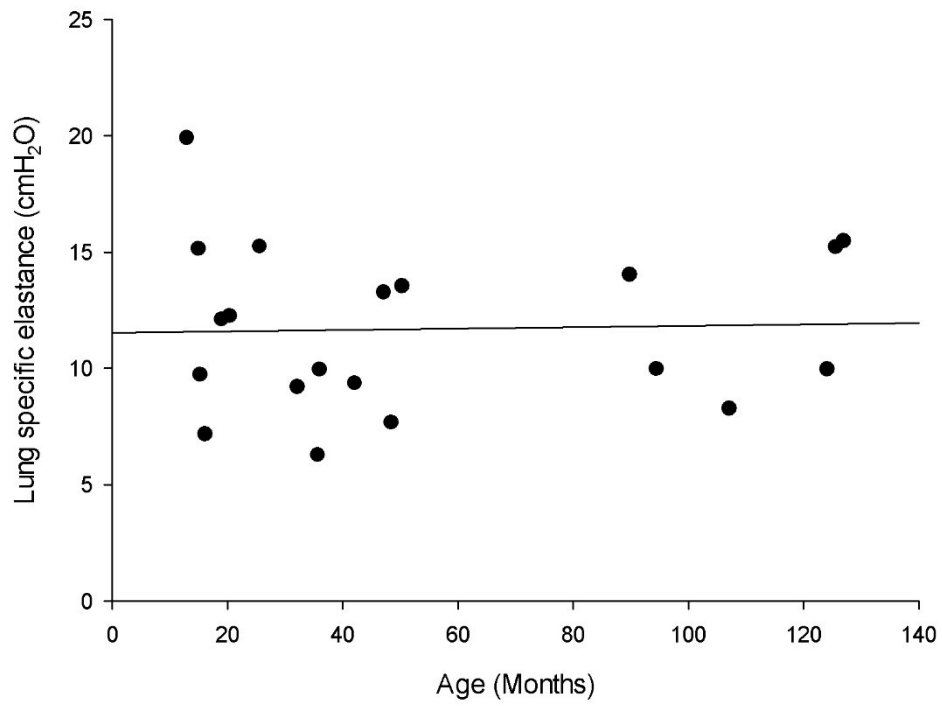

**Table S1.** Comparison between patients with mild and moderate-to-severe ARDS.

| Variable                                                   | ARDS patients (N=10) | Mild ARDS (N=6)      | Moderate to severe ARDS (N=4) | P value |
|------------------------------------------------------------|----------------------|----------------------|-------------------------------|---------|
| Age (Months)                                               | 36 [15 – 50]         | 23 [15 – 48]         | 49 [31 – 89]                  | 0.476   |
| FRC (mL)                                                   | 145 [112 – 200]      | 140 [112 – 180]      | 165 [105 – 230]               | 0.853   |
| EELV at PEEP 4 cmH <sub>2</sub> O (mL)                     | 191 [139 – 280]      | 191 [140 – 213]      | 210 [125 – 311]               | 0.879   |
| EELV at PEEP 12 cmH <sub>2</sub> O (mL)                    | 324 [286 – 387]      | 324 [286 – 365]      | 342 [229 – 435]               | 0.814   |
| Lung specific elastance (cmH <sub>2</sub> O) *             | 13.4 [10.0 – 15.3]   | 11.1 [9.7 – 15.3]    | 14.4 [13.4 – 15.3]            | 0.437   |
| Ers at PEEP 4 cmH <sub>2</sub> O (cmH <sub>2</sub> O/L) *  | 103.4 [82.4 – 142.5] | 103.3 [82.4 – 135.6] | 115.0 [81.1 – 195.5]          | 0.539   |
| Ecw at PEEP 4 cmH <sub>2</sub> O (cmH <sub>2</sub> O/L) *  | 12.9 [10.9 – 15.3]   | 12.7 [10.9 – 15.3]   | 12.9 [10.7 – 22.0]            | 0.914   |
| El at PEEP 4 cmH <sub>2</sub> O (cmH <sub>2</sub> O/L) *   | 93.2 [68.5 – 120.2]  | 93.2 [68.5 – 120.2]  | 95.3 [69.3 – 174.6]           | 0.531   |
| Ers at PEEP 12 cmH <sub>2</sub> O (cmH <sub>2</sub> O/L) * | 113.5 [92.5 – 144.5] | 111.6 [82.8 – 138.1] | 122.7 [96.7 – 191.1]          | 0.382   |
| Ecw at PEEP 12 cmH <sub>2</sub> O (cmH <sub>2</sub> O/L) * | 12.1 [8.5 – 18.7]    | 11.9 [8.3 – 19.2]    | 13.9 [9.6 – 17.9]             | 0.746   |
| El at PEEP 12 cmH <sub>2</sub> O (cmH <sub>2</sub> O/L) *  | 101.4 [84.0 – 127.8] | 100.7 [63.6 – 127.8] | 108.0 [87.1 – 173.2]          | 0.313   |

FRC: functional residual capacity; EELV: end-expiratory lung volume; PEEP: positive end-expiratory pressure; Ers: respiratory system elastance; El: lung elastance; Ecw: chest wall elastance.

\*mean of the value measured at Vt 8-10-12 mL/kg

Statistical analysis: student's t-test, Mann-Whitney Rank Sum Test, as appropriate.
